# Supplementary material for: Racial Differences in Accuracy of Predictive Models for High-Flow Nasal Cannula Failure in COVID-19
Source: PubMed Central journal article supplement — Crit Care Explor. 2024 Mar 12;6(3):e1059. doi: 10.1097/CCE.0000000000001059 (PMC11224893; doi:10.1097/cce.0000000000001059), 2024-03-12
Supplement: cc9-6-e1059-s001.pdf [file cc9-6-e1059-s001.pdf]

**Racial Differences in Accuracy of Predictive Models for High-Flow Nasal Cannula Failure  
in COVID-19**

**Supplementary Materials**

Philip Yang, MD, MSc, Ismail A. Gregory, MD, Chad Robichaux, MPH, Andre L. Holder, MD, MSc, Greg S. Martin, MD, MSc, Annette M. Esper, MD, MSc, Rishikesan Kamaleswaran, PhD, Judy W. Gichoya, MD, Sivasubramaniam V. Bhavani, MD

**Table of Contents**

eTable 1. Full list of study inclusion and exclusion criteria.....3

eTable 2. Full list of clinical variables included in the development of predictive models and the number of missing values in these variables in HFNC failure and non-failure patients.....4

eTable 3. List of R packages utilized for data analysis.....6

eTable 4. Expanded table of clinical characteristics compared between failure and non-failure patients.....7

eFigure 1. Determining the optimal cut-offs in the eXtreme Gradient Boosting (XGB) model and the ROX index. ....9

eTable 5. eXtreme Gradient Boosting (XGB) and ROX index model performance metrics for predicting high-flow nasal cannula failure. ....9

eTable 6. Stratified analyses of predictive models for high-flow nasal cannula failure by race...10

eTable 7. Stratified analyses of the eXtreme Gradient Boosting (XGB) model for high-flow nasal cannula failure by sex and age group.....10

eFigure 2. Calibration belts for eXtreme Gradient Boosting (XGB) model predictions for high-flow nasal cannula failure.....11

eTable 8. Expanded table of clinical characteristics compared between Black and White patients. ....12

eTable 9. Sensitivity analyses.....14

eTable 10. Stratified analyses of predictive models for high-flow nasal cannula failure by race, with high-flow nasal cannula failure defined only by intubation .....15

**eTable 1.** Full list of study inclusion and exclusion criteria.

|                           |                                                                                                                                                                                                                                                                                                                                                                                                                                                                                                                                                                                                                                                                                                                                                                                                             |
|---------------------------|-------------------------------------------------------------------------------------------------------------------------------------------------------------------------------------------------------------------------------------------------------------------------------------------------------------------------------------------------------------------------------------------------------------------------------------------------------------------------------------------------------------------------------------------------------------------------------------------------------------------------------------------------------------------------------------------------------------------------------------------------------------------------------------------------------------|
| <b>Inclusion Criteria</b> | <ul style="list-style-type: none"> <li>• Age <math>\geq 18</math> years</li> <li>• Admitted to one of four Emory University hospitals listed below between March 2020 and April 2022 <ul style="list-style-type: none"> <li>○ Emory University Hospital</li> <li>○ Emory University Hospital Midtown</li> <li>○ Emory Saint Joseph's Hospital</li> <li>○ Emory Johns Creek Hospital</li> </ul> </li> <li>• Diagnosis of COVID-19 <ul style="list-style-type: none"> <li>○ Positive PCR test result for SARS-CoV-2, and/or</li> <li>○ ICD-10 billing code for COVID-19</li> </ul> </li> <li>• Received HFNC therapy <ul style="list-style-type: none"> <li>○ Initiated within the first 24 hours of admission</li> <li>○ For total HFNC therapy duration of <math>\geq 6</math> hours</li> </ul> </li> </ul> |
| <b>Exclusion Criteria</b> | <ul style="list-style-type: none"> <li>• Age <math>&lt; 18</math> years</li> <li>• Admission date outside of the date range specified above</li> <li>• Hospital length of stay <math>&lt; 24</math> hours</li> <li>• Unknown final disposition due to transfer to another hospital</li> <li>• HFNC therapy started more than 24 hours after admission</li> <li>• Total HFNC therapy duration <math>&lt; 6</math> hours</li> </ul>                                                                                                                                                                                                                                                                                                                                                                           |

Abbreviations: PCR = polymerase chain reaction, ICD = International Classification of Diseases, HFNC = high-flow nasal cannula

**eTable 2.** Full list of clinical variables included in the development of predictive models and the number of missing values in these variables in HFNC failure and non-failure patients.

| Variable                              | Number with missing values |                      |
|---------------------------------------|----------------------------|----------------------|
|                                       | Failure<br>n=317           | Non-failure<br>n=667 |
| Age                                   | 0                          | 0                    |
| Sex                                   | 0                          | 0                    |
| Elixhauser comorbidities              | 5                          | 1                    |
| Congestive heart failure              |                            |                      |
| Cardiac arrhythmias                   |                            |                      |
| Valvular disease                      |                            |                      |
| Pulmonary circulation disorders       |                            |                      |
| Hypertension, uncomplicated           |                            |                      |
| Hypertension, complicated             |                            |                      |
| Chronic pulmonary disease             |                            |                      |
| Diabetes, uncomplicated               |                            |                      |
| Diabetes, complicated                 |                            |                      |
| Renal failure                         |                            |                      |
| Liver disease                         |                            |                      |
| AIDS                                  |                            |                      |
| Lymphoma                              |                            |                      |
| Metastatic cancer                     |                            |                      |
| Solid tumor without metastasis        |                            |                      |
| Rheumatoid arthritis or CTD           |                            |                      |
| Coagulopathy                          |                            |                      |
| Obesity                               |                            |                      |
| Fluid and electrolyte disorders       |                            |                      |
| Vital signs                           |                            |                      |
| HR, max/min/median/mean               | 0                          | 0                    |
| HR, sd                                | 11                         | 6                    |
| SBP, max/min/median/mean              | 0                          | 3                    |
| SBP, sd                               | 16                         | 14                   |
| DBP, max/min/median/mean              | 0                          | 3                    |
| DBP, sd                               | 16                         | 14                   |
| MAP by cuff, max/min/median/mean      | 19                         | 28                   |
| MAP by cuff, sd                       | 56                         | 82                   |
| Respiratory rate, max/min/median/mean | 0                          | 0                    |
| Respiratory rate, sd                  | 16                         | 13                   |
| Pulse oximetry, max/min/median/mean   | 0                          | 0                    |
| Pulse oximetry, sd                    | 10                         | 6                    |
| Temperature, max/min/median/mean      | 0                          | 0                    |
| Temperature, sd                       | 9                          | 4                    |
| Labs                                  |                            |                      |
| Sodium, max/min                       | 0                          | 0                    |
| Potassium, max/min                    | 0                          | 0                    |
| Bicarbonate, max/min                  | 0                          | 0                    |

|                                 |    |     |
|---------------------------------|----|-----|
| Blood urea nitrogen, max        | 0  | 0   |
| Creatinine, max                 | 0  | 0   |
| White blood cell count, max/min | 0  | 0   |
| Hemoglobin, min                 | 0  | 0   |
| Hematocrit, min                 | 0  | 0   |
| Platelet, min                   | 0  | 0   |
| Aspartate transferase, max      | 0  | 7   |
| Alanine transferase, max        | 0  | 7   |
| Alkaline phosphatase, max       | 0  | 7   |
| Total bilirubin, max            | 0  | 7   |
| C-reactive protein, max         | 35 | 97  |
| D-dimer, max                    | 18 | 63  |
| Arterial blood gas              |    |     |
| pH, max/min                     | 28 | 171 |
| PaO <sub>2</sub> , max/min      | 47 | 221 |
| PaCO <sub>2</sub> , max/min     | 47 | 220 |
| Treatments                      |    |     |
| Dexamethasone                   | 0  | 0   |
| Remdesivir                      | 0  | 0   |
| Bolus intravenous fluids        | 82 | 185 |
| Norepinephrine                  | 0  | 0   |
| Epinephrine                     | 0  | 0   |
| Phenylephrine                   | 0  | 0   |
| Vasopressin                     | 0  | 0   |
| Dobutamine                      | 0  | 0   |
| Dopamine                        | 0  | 0   |

Abbreviations: AIDS = acquired immunodeficiency syndrome, CTD = connective tissue disease, HR = heart rate, max = maximum, min = minimum, sd = standard deviation, SBP = systolic blood pressure, DBP = diastolic blood pressure, MAP = mean arterial pressure.

**eTable 3.** List of R packages utilized for data analysis.

|                |
|----------------|
| boot           |
| caret          |
| caTools        |
| DescTools      |
| doParallel     |
| foreign        |
| gbm            |
| gdata          |
| ggplot2        |
| ggpubr         |
| givitiR        |
| glmnet         |
| gtools         |
| imputeMissings |
| lattice        |
| magrittr       |
| mice           |
| MLmetrics      |
| pdp            |
| predtools      |
| pROC           |
| PRROC          |
| qwraps2        |
| randomForest   |
| RANN           |
| readr          |
| reshape2       |
| rms            |
| ROCR           |
| SHAPforxgboost |
| tidymodels     |
| tidyverse      |
| xgboost        |

**eTable 4.** Expanded table of clinical characteristics compared between failure and non-failure patients.

| <b>Characteristic</b>                                  | <b>Failure<br/>(N = 317)</b> | <b>Non-failure<br/>(N = 667)</b> | <b>p</b> |
|--------------------------------------------------------|------------------------------|----------------------------------|----------|
| Age, median (IQR)                                      | 65 (55-76)                   | 61 (50-71)                       | <0.01    |
| Sex, n (%)                                             |                              |                                  |          |
| Female                                                 | 147 (46.4%)                  | 297 (44.5%)                      | 0.63     |
| Male                                                   | 170 (53.6%)                  | 370 (55.5%)                      |          |
| Race, n (%)                                            |                              |                                  |          |
| Asian                                                  | 14 (4.4%)                    | 29 (4.4%)                        | 0.89     |
| Black                                                  | 163 (51.4%)                  | 337 (50.5%)                      |          |
| Other                                                  | 32 (10.1%)                   | 79 (11.8%)                       |          |
| White                                                  | 108 (34.1%)                  | 222 (33.3%)                      |          |
| Comorbidities, n (%)                                   |                              |                                  |          |
| Congestive heart failure                               | 63/312 (20.2%)               | 135/666 (20.3%)                  | 1.00     |
| HTN, uncomplicated                                     | 117/312 (37.5%)              | 253/666 (38.0%)                  | 0.94     |
| HTN, complicated                                       | 121/312 (38.8%)              | 186/666 (27.9%)                  | <0.01    |
| Chronic pulmonary disease                              | 71/312 (22.8%)               | 141/666 (21.2%)                  | 0.62     |
| Diabetes, uncomplicated                                | 30/312 (9.6%)                | 66/666 (9.9%)                    | 1.00     |
| Diabetes, complicated                                  | 117/312 (37.5%)              | 189/666 (28.4%)                  | <0.01    |
| Renal failure                                          | 95/312 (30.5%)               | 134/666 (20.1%)                  | <0.01    |
| Liver disease                                          | 11/312 (3.5%)                | 33/666 (5.0%)                    | 0.41     |
| AIDS                                                   | 3/312 (1.0%)                 | 5/666 (0.8%)                     | 0.72     |
| Lymphoma                                               | 7/312 (2.2%)                 | 9/666 (1.4%)                     | 0.29     |
| Metastatic cancer                                      | 7/312 (2.2%)                 | 12/666 (1.8%)                    | 0.63     |
| Solid tumor without mets                               | 9/312 (2.9%)                 | 27/666 (4.1%)                    | 0.47     |
| Vital signs, mean (sd)                                 |                              |                                  |          |
| Heart rate, max                                        | 103.71 ± 17.54               | 102.64 ± 18.48                   | 0.38     |
| SBP, min                                               | 113.80 ± 19.31               | 113.64 ± 18.82                   | 0.90     |
| DBP, min                                               | 62.88 ± 10.96                | 63.89 ± 11.64                    | 0.19     |
| MAP by cuff, min                                       | 82.53 ± 15.15                | 84.59 ± 12.57                    | 0.04     |
| Respiratory rate, max                                  | 31.08 ± 7.75                 | 28.67 ± 10.67                    | <0.01    |
| Pulse oximetry, min                                    | 85.11 ± 9.46                 | 87.73 ± 8.32                     | <0.01    |
| Temperature, max                                       | 37.77 ± 0.85                 | 37.61 ± 0.82                     | 0.01     |
| Temperature, min                                       | 36.35 ± 0.67                 | 36.37 ± 0.55                     | 0.68     |
| Laboratory values, mean (sd)                           |                              |                                  |          |
| BUN, max                                               | 32.46 ± 24.44                | 26.10 ± 19.89                    | <0.01    |
| Creatinine, max                                        | 1.86 ± 2.03                  | 1.50 ± 1.65                      | 0.01     |
| WBC, max                                               | 10.52 ± 10.93                | 10.02 ± 6.20                     | 0.45     |
| WBC, min                                               | 8.82 ± 9.38                  | 8.34 ± 5.43                      | 0.39     |
| Platelets, min                                         | 204.27 ± 81.94               | 230.61 ± 88.60                   | <0.01    |
| C-reactive protein, max                                | 170.04 ± 90.59               | 151.50 ± 86.39                   | <0.01    |
| D-dimer, max                                           | 5,586 ± 13,045               | 5,791 ± 13,902                   | 0.83     |
| Arterial blood gas in the first 24 hours, n; mean (sd) |                              |                                  |          |
| pH, max                                                | 289; 7.43 ± 0.06             | 496; 7.44 ± 0.05                 | 0.12     |

|                                                      |                     |                    |       |
|------------------------------------------------------|---------------------|--------------------|-------|
| pH, min                                              | 289; 7.39 ± 0.09    | 496; 7.41 ± 0.07   | <0.01 |
| PaO <sub>2</sub> , max                               | 270; 100.46 ± 57.75 | 446; 94.55 ± 54.24 | 0.18  |
| PaO <sub>2</sub> , min                               | 270; 67.87 ± 29.00  | 446; 72.40 ± 27.82 | 0.04  |
| PaCO <sub>2</sub> , max                              | 270; 38.99 ± 11.41  | 447; 37.14 ± 8.84  | 0.02  |
| PaCO <sub>2</sub> , min                              | 270; 33.64 ± 7.58   | 447; 34.34 ± 7.67  | 0.24  |
| Treatments received                                  |                     |                    |       |
| Bolus IV fluids, median (IQR)                        | 750 (500-1,250)     | 750 (250-1,250)    | 0.11  |
| Dexamethasone, n (%)                                 | 241 (76.0%)         | 539 (80.8%)        | 0.10  |
| Remdesivir, n (%)                                    | 143 (45.1%)         | 362 (54.3%)        | 0.01  |
| Norepinephrine, n (%)                                | 64 (20.2%)          | 38 (5.7%)          | <0.01 |
| Vasopressin, n (%)                                   | 10 (3.2%)           | 12 (1.8%)          | 0.25  |
| Outcomes                                             |                     |                    |       |
| NIV, n (%)                                           | 105 (33.1%)         | 99 (14.8%)         | <0.01 |
| IMV, n (%)                                           | 288 (90.9%)         | 116 (17.4%)        | <0.01 |
| Mortality, n (%)                                     | 141 (44.5%)         | 49 (7.4%)          | <0.01 |
| HFNC duration, median (IQR)                          | 179 (62-379)        | 151 (79-249)       | 0.04  |
| LOS, median (IQR)                                    | 409 (213-712)       | 221 (160-354)      | <0.01 |
| Worst ROX index in the first 24 hours, mean (sd)     | 5.54 ± 4.36         | 7.11 ± 4.80        | <0.01 |
| SOFA score at the time of HFNC initiation, mean (sd) | 7.21 ± 2.69         | 4.27 ± 2.47        | <0.01 |

Abbreviations: IQR = interquartile range, HTN = hypertension, AIDS = acquired immunodeficiency syndrome, SBP = systolic blood pressure, DBP = diastolic blood pressure, MAP = mean arterial pressure, BUN = blood urea nitrogen, WBC = white blood cell count, IV = intravenous, NIV = non-invasive ventilation, IMV = invasive mechanical ventilation, HFNC = high-flow nasal cannula, LOS = length of stay, SOFA = sequential organ failure assessment.



**eFigure 1.** Determining the optimal cut-offs in the eXtreme Gradient Boosting (XGB) model and the ROX index.

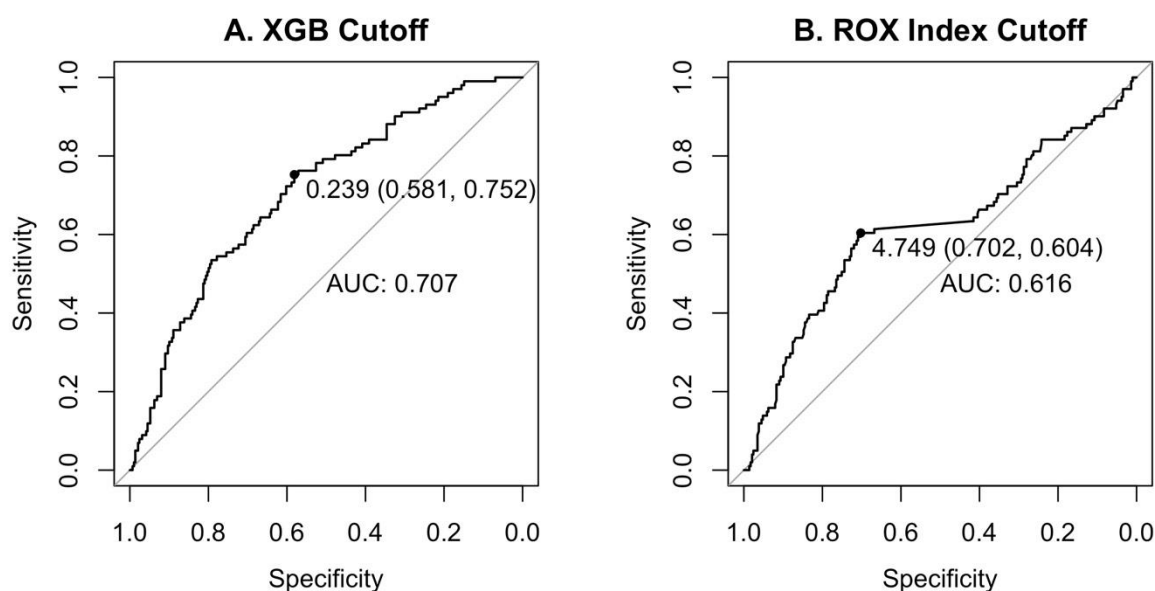

Receiver-operator characteristic (ROC) curves of A. eXtreme Gradient Boosting (XGB) model and B. ROX index. The point marked on the ROC curves indicate the optimal cut-off value, with specificity and sensitivity values at that cut-off in parentheses. Area under the ROC curve (AUC) are indicated separately.

**eTable 5.** eXtreme Gradient Boosting (XGB) and ROX index model performance metrics for predicting high-flow nasal cannula failure.

|                                                                                | <b>Sensitivity<br/>(True<br/>positive<br/>rate)</b> | <b>Specificity<br/>(True<br/>negative<br/>rate)</b> | <b>False<br/>positive<br/>rate</b> | <b>False<br/>negative<br/>rate</b> |
|--------------------------------------------------------------------------------|-----------------------------------------------------|-----------------------------------------------------|------------------------------------|------------------------------------|
| XGB model-predicted<br>probability of HFNC failure<br>(Optimal cutoff = 0.239) |                                                     |                                                     |                                    |                                    |
| Overall cohort                                                                 | 0.753                                               | 0.581                                               | 0.419                              | 0.248                              |
| Black patients                                                                 | 0.723                                               | 0.568                                               | 0.432                              | 0.277                              |
| White patients                                                                 | 0.828                                               | 0.582                                               | 0.418                              | 0.172                              |
| ROX index score<br>(Optimal cutoff = 4.749)                                    |                                                     |                                                     |                                    |                                    |
| Overall cohort                                                                 | 0.604                                               | 0.702                                               | 0.298                              | 0.396                              |
| Black patients                                                                 | 0.615                                               | 0.710                                               | 0.290                              | 0.385                              |
| White patients                                                                 | 0.655                                               | 0.704                                               | 0.296                              | 0.345                              |

**eTable 6.** Stratified analyses of predictive models for high-flow nasal cannula failure by race.

| <b>Model</b> | <b>AUROC (95%CI), overall cohort</b> | <b>AUROC (95%CI), Black patients</b> | <b>AUROC (95%CI), White patients</b> | <b>p-value comparing Black vs. White patients</b> |
|--------------|--------------------------------------|--------------------------------------|--------------------------------------|---------------------------------------------------|
| XGB          | 0.707 (0.650-0.765)                  | 0.663 (0.586-0.740)                  | 0.808 (0.717-0.900)                  | 0.02                                              |
| LR           | 0.673 (0.612-0.735)                  | 0.662 (0.583-0.742)                  | 0.709 (0.601-0.817)                  | 0.50                                              |
| SVM          | 0.657 (0.597-0.717)                  | 0.626 (0.546-0.705)                  | 0.700 (0.593-0.806)                  | 0.28                                              |
| ROX index    | 0.616 (0.546-0.685)                  | 0.613 (0.523-0.702)                  | 0.691 (0.571-0.811)                  | 0.31                                              |
| KNN          | 0.526 (0.461-0.592)                  | 0.509 (0.424-0.593)                  | 0.572 (0.449-0.696)                  | 0.40                                              |

Abbreviations: AUROC = area under the receiver-operator characteristic curve, CI = confidence interval, XGB = eXtreme Gradient Boosting, SVM = support vector machines, LR = logistic regression, KNN = k-nearest neighbor

**eTable 7.** Stratified analyses of the eXtreme Gradient Boosting (XGB) model for high-flow nasal cannula failure by sex and age group.

| <b>Stratified analyses</b> | <b>AUROC (95% CI)</b> | <b>p-value</b> |
|----------------------------|-----------------------|----------------|
| By sex                     |                       |                |
| Female (n=186)             | 0.694 (0.610-0.778)   | 0.68           |
| Male (n=204)               | 0.717 (0.639-0.795)   |                |
| By age group               |                       |                |
| <65 years old (n=232)      | 0.690 (0.612-0.769)   | 0.43           |
| ≥65 years old (n=158)      | 0.739 (0.656-0.822)   |                |

**eFigure 2.** Calibration belts for eXtreme Gradient Boosting (XGB) model predictions for high-flow nasal cannula failure.

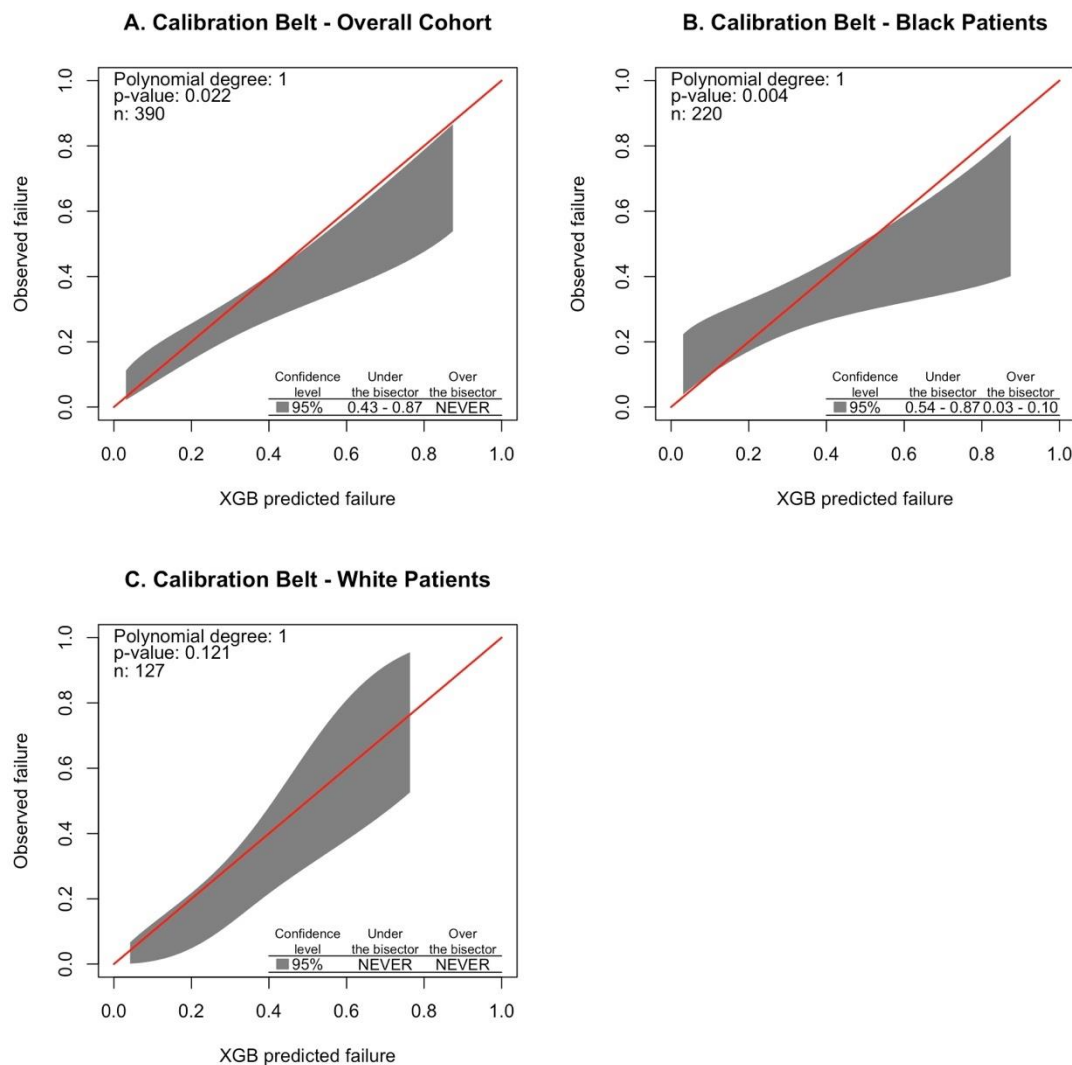

In each panel, the red bisector line indicates the ideal, perfect correlation between prediction and observation, and the gray ribbon plots the model predicted risk of failure (on x-axis) against the actual observation (on y-axis). If the gray ribbon is under the bisector, then the predicted risk was higher than the observed value, indicating that the model overestimated failure; if the gray ribbon is over the bisector, then the predicted risk was lower than the observed value, indicating that the model underestimated failure. P-value <0.05 indicates miscalibration in the model. At the bottom right of each panel, the ranges of predicted risk of failure for which observed values deviated significantly from the bisector in each subgroup are reported. (A) In the overall cohort, model overestimated failure (i.e. gray ribbon was under the bisector) for patients whose predicted risk of failure was 43-87%. (B) In Black patients, model overestimated failure (i.e. gray ribbon was under the bisector) for patients with predicted risk of failure between 54-87%, and underestimated failure (i.e. gray ribbon was over the bisector) for those with predicted risk of failure between 3-10%. (C) In White patients, the model neither over- nor under-estimate the risk of failure.

**eTable 8.** Expanded table of clinical characteristics compared between Black and White patients.

| <b>Characteristic</b>                                  | <b>Black patients<br/>(N = 500)</b> | <b>White patients<br/>(N = 330)</b> | <b>p</b> |
|--------------------------------------------------------|-------------------------------------|-------------------------------------|----------|
| Age, median (IQR)                                      | 61 (51-71)                          | 67 (57-76)                          | <0.01    |
| Sex, n (%)                                             |                                     |                                     |          |
| Female                                                 | 261 (52.2%)                         | 127 (38.5%)                         | <0.01    |
| Male                                                   | 239 (47.8%)                         | 203 (61.5%)                         |          |
| Comorbidities, n (%)                                   |                                     |                                     |          |
| Congestive heart failure                               | 116/496 (23.4%)                     | 67/329 (20.4%)                      | 0.35     |
| HTN, uncomplicated                                     | 190/496 (38.3%)                     | 122/329 (37.1%)                     | 0.77     |
| HTN, complicated                                       | 194/496 (39.1%)                     | 88/329 (26.8%)                      | <0.01    |
| Chronic pulmonary disease                              | 120/496 (24.2%)                     | 71/329 (21.6%)                      | 0.40     |
| Diabetes, uncomplicated                                | 57/496 (11.5%)                      | 27/329 (8.2%)                       | 0.16     |
| Diabetes, complicated                                  | 189/496 (38.1%)                     | 67/329 (20.4%)                      | <0.01    |
| Renal failure                                          | 154/496 (31.1%)                     | 57/329 (17.3%)                      | <0.01    |
| Liver disease                                          | 19/496 (3.8%)                       | 13/329 (4.0%)                       | 1.00     |
| AIDS                                                   | 6/496 (1.2%)                        | 2/329 (0.6%)                        | 0.49     |
| Lymphoma                                               | 8/496 (1.6%)                        | 5/329 (1.5%)                        | 1.00     |
| Metastatic cancer                                      | 8/496 (1.6%)                        | 10/329 (3.0%)                       | 0.22     |
| Solid tumor without mets                               | 17/496 (3.4%)                       | 18/329 (5.5%)                       | 0.16     |
| Vital signs, mean (sd)                                 |                                     |                                     |          |
| Heart rate, max                                        | 104.82 ± 18.56                      | 99.83 ± 17.54                       | <0.01    |
| SBP, min                                               | 114.80 ± 19.99                      | 112.45 ± 18.57                      | 0.09     |
| DBP, min                                               | 64.55 ± 11.94                       | 62.44 ± 10.93                       | <0.01    |
| MAP by cuff, min                                       | 85.75 ± 14.04                       | 82.24 ± 13.26                       | <0.01    |
| Respiratory rate, max                                  | 30.02 ± 11.60                       | 28.12 ± 7.56                        | <0.01    |
| Pulse oximetry, min                                    | 87.74 ± 8.36                        | 86.15 ± 9.24                        | 0.01     |
| Temperature, max                                       | 37.61 ± 0.79                        | 37.65 ± 0.86                        | 0.44     |
| Temperature, min                                       | 36.34 ± 0.63                        | 36.33 ± 0.57                        | 0.84     |
| Laboratory values, mean (sd)                           |                                     |                                     |          |
| BUN, max                                               | 29.93 ± 24.02                       | 27.95 ± 17.41                       | 0.17     |
| Creatinine, max                                        | 1.94 ± 2.20                         | 1.33 ± 1.11                         | <0.01    |
| WBC, max                                               | 10.27 ± 9.97                        | 10.23 ± 5.89                        | 0.95     |
| WBC, min                                               | 8.68 ± 8.76                         | 8.36 ± 4.73                         | 0.50     |
| Platelets, min                                         | 230.29 ± 86.85                      | 204.69 ± 82.16                      | <0.01    |
| C-reactive protein, max                                | 156.49 ± 81.07                      | 151.58 ± 90.10                      | 0.46     |
| D-dimer, max                                           | 7,316 ± 16,235                      | 3,488 ± 7,662                       | <0.01    |
| Arterial blood gas in the first 24 hours, n; mean (sd) |                                     |                                     |          |
| pH, max                                                | 394; 7.43 ± 0.06                    | 263; 7.45 ± 0.06                    | <0.01    |
| pH, min                                                | 394; 7.39 ± 0.08                    | 263; 7.41 ± 0.08                    | <0.01    |
| PaO <sub>2</sub> , max                                 | 366; 99.74 ± 56.97                  | 231; 91.60 ± 51.34                  | 0.07     |
| PaO <sub>2</sub> , min                                 | 366; 71.97 ± 29.21                  | 231; 69.70 ± 28.37                  | 0.35     |
| PaCO <sub>2</sub> , max                                | 366; 39.24 ± 10.85                  | 231; 36.88 ± 9.55                   | 0.01     |
| PaCO <sub>2</sub> , min                                | 366; 35.27 ± 7.65                   | 231; 33.43 ± 8.43                   | 0.01     |

|                                                      |                 |                 |       |
|------------------------------------------------------|-----------------|-----------------|-------|
| Missing ABG data, n (%)                              |                 |                 |       |
| pH, min/max                                          | 106 (21.2%)     | 67 (20.3%)      | 0.82  |
| PaO <sub>2</sub> , min/max                           | 134 (26.8%)     | 99 (30.0%)      | 0.35  |
| PaCO <sub>2</sub> , min/max                          | 134 (26.8%)     | 99 (30.0%)      | 0.35  |
| Treatments received                                  |                 |                 |       |
| Bolus IV fluids, median (IQR)                        | 750 (500-1,250) | 750 (375-1,250) | 0.44  |
| Dexamethasone, n (%)                                 | 385 (77.0%)     | 273 (82.7%)     | 0.06  |
| Remdesivir, n (%)                                    | 238 (47.6%)     | 192 (58.2%)     | <0.01 |
| Norepinephrine, n (%)                                | 57 (11.4%)      | 32 (9.7%)       | 0.51  |
| Vasopressin, n (%)                                   | 12 (2.4%)       | 7 (2.1%)        | 1.00  |
| Outcomes                                             |                 |                 |       |
| Failure, n (%)                                       | 163 (32.6%)     | 108 (32.7%)     | 1.00  |
| NIV, n (%)                                           | 127 (25.4%)     | 65 (19.7%)      | 0.07  |
| IMV, n (%)                                           | 221 (44.2%)     | 126 (38.2%)     | 0.10  |
| Mortality, n (%)                                     | 86 (17.2%)      | 77 (23.3%)      | 0.04  |
| Time to HFNC, median (IQR)                           | 2.9 (0.6-9.5)   | 4.4 (1.1-12.3)  | <0.01 |
| HFNC duration, median (IQR)                          | 147 (67-282)    | 160 (81-268)    | 0.63  |
| LOS, median (IQR)                                    | 258 (166-503)   | 255 (161-411)   | 0.11  |
| Worst ROX index in the first 24 hours, mean (sd)     | 6.35 ± 4.48     | 6.39 ± 4.85     | 0.92  |
| SOFA score at the time of HFNC initiation, mean (sd) | 5.41 ± 2.97     | 5.08 ± 2.75     | 0.10  |

Abbreviations: IQR = interquartile range, HTN = hypertension, AIDS = acquired immunodeficiency syndrome, SBP = systolic blood pressure, DBP = diastolic blood pressure, MAP = mean arterial pressure, BUN = blood urea nitrogen, WBC = white blood cell count, PaO<sub>2</sub> = partial pressure arterial oxygen, PaCO<sub>2</sub> = partial pressure arterial carbon dioxide, ABG = arterial blood gas, IV = intravenous, NIV = non-invasive ventilation, IMV = invasive mechanical ventilation, HFNC = high-flow nasal cannula, LOS = length of stay, SOFA = sequential organ failure assessment.

**eTable 9.** Sensitivity analyses.

| <b>Sensitivity analysis</b>                                                     | <b>AUROC,<br/>overall<br/>cohort</b> | <b>AUROC,<br/>Black<br/>patients</b> | <b>AUROC,<br/>White<br/>patients</b> | <b>Absolute<br/>difference<br/>in AUROC<br/>between<br/>Black and<br/>White<br/>patients</b> | <b>p-value<br/>comparing<br/>AUROC<br/>between<br/>Black and<br/>White<br/>patients</b> |
|---------------------------------------------------------------------------------|--------------------------------------|--------------------------------------|--------------------------------------|----------------------------------------------------------------------------------------------|-----------------------------------------------------------------------------------------|
| <b>XGB model – modifying model parameters</b>                                   |                                      |                                      |                                      |                                                                                              |                                                                                         |
| Original XGB model validation                                                   | 0.707                                | 0.663                                | 0.808                                | 0.145                                                                                        | 0.02                                                                                    |
| <i>Exclude SpO2 variables, predicting HFNC failure</i>                          | 0.690                                | 0.638                                | 0.794                                | 0.155                                                                                        | 0.01                                                                                    |
| <i>Exclude SpO2 and RR variables, predicting HFNC failure</i>                   | 0.656                                | 0.617                                | 0.726                                | 0.109                                                                                        | 0.08                                                                                    |
| <i>Exclude all vital sign variables, predicting HFNC failure</i>                | 0.626                                | 0.581                                | 0.715                                | 0.134                                                                                        | 0.03                                                                                    |
| Include all variables from original XGB model, <i>predicting mortality</i>      | 0.760                                | 0.784                                | 0.749                                | 0.035                                                                                        | 0.67                                                                                    |
| <b>XGB model – modifying strategies for handling missing data</b>               |                                      |                                      |                                      |                                                                                              |                                                                                         |
| Missing variables <i>left as missing</i>                                        | 0.724                                | 0.673                                | 0.833                                | 0.160                                                                                        | <0.01                                                                                   |
| Original XGB model validation with <i>median imputation</i>                     | 0.707                                | 0.663                                | 0.808                                | 0.145                                                                                        | 0.02                                                                                    |
| <i>Predictive mean matching imputation</i>                                      | 0.696                                | 0.659                                | 0.779                                | 0.120                                                                                        | 0.05                                                                                    |
| <i>Exclude patients with missing ABG data (n=223)</i>                           | 0.654                                | 0.629                                | 0.669                                | 0.040                                                                                        | 0.65                                                                                    |
| <b>ROX index</b>                                                                |                                      |                                      |                                      |                                                                                              |                                                                                         |
| Original ROX index validation w/ <i>median imputation</i>                       | 0.616                                | 0.613                                | 0.691                                | 0.079                                                                                        | 0.31                                                                                    |
| <i>Predictive mean matching imputation</i> for ROX index                        | 0.632                                | 0.610                                | 0.745                                | 0.135                                                                                        | 0.04                                                                                    |
| <i>Exclude patients with missing ROX index, predicting HFNC failure (n=318)</i> | 0.614                                | 0.605                                | 0.705                                | 0.100                                                                                        | 0.18                                                                                    |

Abbreviations: AUROC = area under receiver-operator characteristic curve, XGB = eXtreme Gradient Boosting, SpO2 = oxygen saturation, HFNC = high-flow nasal cannula, RR = respiratory rate.

**eTable 10.** Stratified analyses of predictive models for high-flow nasal cannula failure by race, with high-flow nasal cannula failure defined only by intubation

| <b>Model</b> | <b>AUROC (95%CI), overall cohort</b> | <b>AUROC (95%CI), Black patients</b> | <b>AUROC (95%CI), White patients</b> | <b>p-value comparing Black vs. White patients</b> |
|--------------|--------------------------------------|--------------------------------------|--------------------------------------|---------------------------------------------------|
| XGB          | 0.700 (0.640-0.760)                  | 0.667 (0.587-0.747)                  | 0.767 (0.673-0.862)                  | 0.11                                              |
| LR           | 0.657 (0.594-0.721)                  | 0.646 (0.564-0.727)                  | 0.668 (0.553-0.784)                  | 0.75                                              |
| SVM          | 0.635 (0.572-0.698)                  | 0.607 (0.526-0.688)                  | 0.660 (0.542-0.778)                  | 0.48                                              |
| ROX index    | 0.607 (0.536-0.678)                  | 0.620 (0.530-0.710)                  | 0.656 (0.528-0.784)                  | 0.66                                              |
| KNN          | 0.534 (0.467-0.601)                  | 0.520 (0.435-0.605)                  | 0.561 (0.433-0.690)                  | 0.59                                              |

Abbreviations: AUROC = area under the receiver-operator characteristic curve, CI = confidence interval, XGB = eXtreme Gradient Boosting, SVM = support vector machines, LR = logistic regression, KNN = k-nearest neighbor
